# Supplementary material for: Reduction of the ambient effect in multilayer InSe transistors and a strategy toward stable 2D-based optoelectronic applications
Source: Royal Society of Chemistry journal article supplement (doi:10.1039/d0nr04120c), 2020-01-01
Supplement: d0nr04120c1.pdf [file d0nr04120c1.pdf]

## Supplementary Information

### Depression of ambient effect in multilayer InSe transistor and a strategy toward to stable 2D-based optoelectronic applications

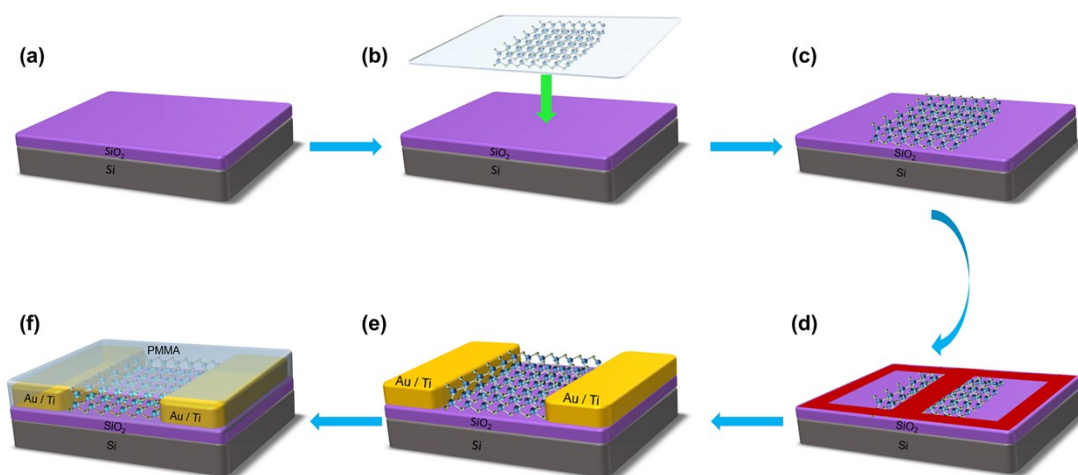

Fig. S1. The process of fabricating multilayer InSe FETs. (a) Prepare and clean the Si/SiO<sub>2</sub> wafer as a substrate. (b) Transfer the InSe flakes from bulk InSe crystals using Scotch tape. (c) The InSe flake is successfully transferred to the substrate by mechanical exfoliation. (d) A shadow mask is placed onto the InSe flake under the microscope to define the channel and electrodes. (e) The Ti/Au electrodes are deposited by electron beam evaporation. (f) PMMA layer is coated on the surface of the multilayer InSe FET.

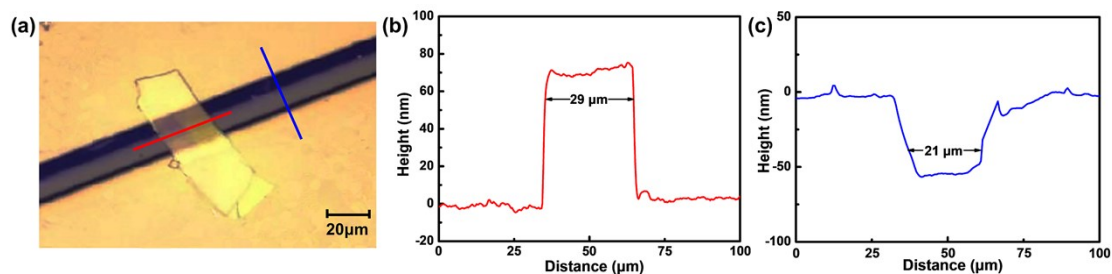

Fig. S2. (a) Optical microscope image of the InSe FET, scale bar is 20 μm. (b) The thickness of InSe film in the channel, corresponding to the red line in figure (a). (c) The thickness of Ti/Au electrodes through the channel of InSe FET, corresponding to the blue line in figure (a).

**Table S1. Negative photoconductivity observed in different systems and its mechanism**

| Material                                        | Dim | NPC mechanism                                                         | References |
|-------------------------------------------------|-----|-----------------------------------------------------------------------|------------|
| InAs nanowire                                   | 1D  | hot carrier trapping                                                  | 1          |
| InAs nanowire                                   | 1D  | hot carrier trapping                                                  | 2          |
| InAs nanowire                                   | 1D  | defect states in the native oxide layer                               | 3          |
| graphene                                        | 2D  | photoinduced impurity scattering                                      | 4          |
| FePS <sub>3</sub>                               | 2D  | the competition between hole concentration and mobility               | 5          |
| WS <sub>2</sub> with Au NPs                     | 2D  | interfacial trapping and detrapping of electrons                      | 6          |
| ReS <sub>2</sub> /h-BN/MoS <sub>2</sub>         | 2D  | charge transfer between the floating layer and the conduction channel | 7          |
| Cr <sub>2</sub> Ge <sub>2</sub> Te <sub>6</sub> | 2D  | hot carrier trapping                                                  | 8          |
| SnSe <sub>2</sub>                               | 2D  | the competition between hole concentration and mobility               | 9          |
| carbon nanotube                                 | 1D  | /                                                                     | 10         |
| InSe                                            | 2D  | the competition between hole concentration and mobility               | this work  |

**Table S2. Comparison of responsivity (R) and detectivity (D\*) values for the different InSe-based photodetectors**

| Structure     | $\lambda$ (nm) | R (A/W)               | D* (Jones)              | References |
|---------------|----------------|-----------------------|-------------------------|------------|
| InSe          | 633            | 157                   | $1.07 \times 10^{11}$   | 11         |
| InSe/Graphene | 500            | 60                    | /                       | 12         |
| InSe          | 254            | $5.68 \times 10^4$    | $\sim 1 \times 10^{13}$ | 13         |
|               | 490            | $3.57 \times 10^4$    | $\sim 1 \times 10^{13}$ |            |
|               | 700            | $3.06 \times 10^4$    | $\sim 1 \times 10^{13}$ |            |
|               | 850            | $2.98 \times 10^4$    | $\sim 1 \times 10^{12}$ |            |
| InSe/Graphene | 532            | 0.101                 | /                       | 14         |
| InSe          | 808            | $4.90 \times 10^{-6}$ | /                       | 15         |
| InSe          | 325            | $1.80 \times 10^7$    | $1.10 \times 10^{15}$   | 16         |
|               | 532            | $2.40 \times 10^6$    | $1.40 \times 10^{14}$   |            |
| InSe          | 365            | 0.369                 | $8.00 \times 10^{12}$   | 17         |
|               | 685            | 0.244                 | $2.56 \times 10^{11}$   |            |
| InSe          | 450            | 633.33                | $3.17 \times 10^{10}$   | this work  |

## References

1. Y. Yang, X. Peng, H. S. Kim, T. Kim, S. Jeon, H. K. Kang, W. Choi, J. Song, Y. J. Doh and D. Yu, *Nano Lett*, 2015, **15**, 5875-5882.
2. J. A. Alexander-Webber, C. K. Groschner, A. A. Sagade, G. Tainter, M. F. Gonzalez-Zalba, R. Di Pietro, J. Wong-Leung, H. H. Tan, C. Jagadish, S. Hofmann and H. J. Joyce, *ACS Appl Mater Interfaces*, 2017, **9**, 43993-44000.
3. Y. Han, M. Fu, Z. Tang, X. Zheng, X. Ji, X. Wang, W. Lin, T. Yang and Q. Chen, *ACS Appl Mater Interfaces*, 2017, **9**, 2867-2874.
4. C. Biswas, F. Gunes, D. L. Duong, S. C. Lim, M. S. Jeong, D. Pribat and Y. H. Lee, *Nano Lett*, 2011, **11**, 4682-4687.
5. Y. Gao, S. Lei, T. Kang, L. Fei, C. L. Mak, J. Yuan, M. Zhang, S. Li, Q. Bao, Z. Zeng, Z. Wang, H. Gu and K. Zhang, *Nanotechnology*, 2018, **29**, 244001.
6. B. H. Kim, S. H. Kwon, H. H. Gu and Y. J. Yoon, *Physica E: Low-dimensional Systems and Nanostructures*, 2019, **106**, 45-49.
7. Y. Wang, E. Liu, A. Gao, T. Cao, M. Long, C. Pan, L. Zhang, J. Zeng, C. Wang, W. Hu, S. J. Liang and F. Miao, *ACS Nano*, 2018, **12**, 9513-9520.

8. L. Xie, L. Guo, W. Yu, T. Kang, R. K. Zheng and K. Zhang, *Nanotechnology*, 2018, **29**, 464002.
9. H. Xu, J. Xing, Y. Huang, C. Ge, J. Lu, X. Han, J. Du, H. Hao, J. Dong and H. Liu, *Nanoscale Res Lett*, 2019, **14**, 17.
10. J.-L. Zhu, G. Zhang, J. Wei and J.-L. Sun, *Applied Physics Letters*, 2012, **101**, 123117.
11. S. R. Tamalampudi, Y. Y. Lu, U. R. Kumar, R. Sankar, C. D. Liao, B. K. Moorthy, C. H. Cheng, F. C. Chou and Y. T. Chen, *Nano Lett*, 2014, **14**, 2800-2806.
12. W. Luo, Y. Cao, P. Hu, K. Cai, Q. Feng, F. Yan, T. Yan, X. Zhang and K. Wang, *Advanced Optical Materials*, 2015, **3**, 1418-1423.
13. W. Feng, J.-B. Wu, X. Li, W. Zheng, X. Zhou, K. Xiao, W. Cao, B. Yang, J.-C. Idrobo, L. Basile, W. Tian, P. Tan and P. Hu, *Journal of Materials Chemistry C*, 2015, **3**, 7022-7028.
14. Z. Chen, J. Biscaras and A. Shukla, *Nanoscale*, 2015, **7**, 5981-5986.
15. Z. Li, H. Qiao, Z. Guo, X. Ren, Z. Huang, X. Qi, S. C. Dhanabalan, J. S. Ponraj, D. Zhang, J. Li, J. Zhao, J. Zhong and H. Zhang, *Advanced Functional Materials*, 2018, **28**, 1705237.
16. H. W. Yang, H. F. Hsieh, R. S. Chen, C. H. Ho, K. Y. Lee and L. C. Chao, *ACS Appl Mater Interfaces*, 2018, **10**, 5740-5749.
17. M. Dai, H. Chen, R. Feng, W. Feng, Y. Hu, H. Yang, G. Liu, X. Chen, J. Zhang, C. Y. Xu and P. Hu, *ACS Nano*, 2018, **12**, 8739-8747.
